# Supplementary material
Source: PubMed Central journal article supplement (PMC3284774)
Supplement: supp_me.2009-0286_me-09-0286.pdf [file supp_me.2009-0286_me-09-0286.pdf]

## Supplemental figure legends

**SFigure 1.** (A) Real-time PCR analysis of CYP2E1 mRNA levels. (B) Percentage of the survival mice after CCl<sub>4</sub> injection.

**SFigure 2.** (A) Real-time PCR analysis of VP16, FXR, and SHP in the wild-type mice treated with adenovirus by tail-vein injection. \*,  $p < 0.05$ . (B) Serum ALT and BAs in the FXR<sup>-/-</sup> mice infected with adenovirus. \*,  $p < 0.05$ .

**SFigure 3.** Real-time PCR analysis of hepatic IL-6 expression in 1% CA and control diet feeding mice after 70% PH (A), and after CCl<sub>4</sub> treatment (B), and in 4% Resin diet feeding mice after CCl<sub>4</sub> treatment (C), and in adenovirus-treated FXR<sup>-/-</sup> mice after CCl<sub>4</sub> treatment (D).

**SFigure 4.** (A)&(B) Quantification of phospho-STAT3 in 1% CA-containing food feeding mice with CCl<sub>4</sub> treatment and 70% PH, respectively. (C) Immunoblot analysis of gp130 protein levels and p38 $\alpha$  phosphorylation in 1% CA-containing-diet feeding mice after 70% PH.

**SFigure 5.** (A) Serum ALT and BAs in the wild-type mice fed with 0.2% CA- or 2% Resin-containing diet after CCl<sub>4</sub> treatment. \*,  $p < 0.05$ . ALT is shown as the average value of 4 mice for each group. (B) Real-time PCR analysis of FoxM1B and Cyclin D1. The relative mRNA levels are shown as the average value of 4 mice for each group. (C) & (D) Representative figures of TUNEL and H&E staining. (E) Representative figures of BrdU staining. (F) Quantification of proliferating and apoptotic cells in the liver of wild-type mice. \*,  $p < 0.05$ .

**SFigure 1**

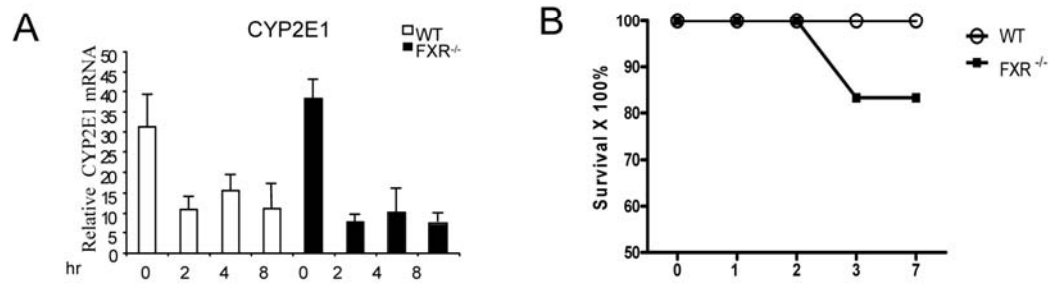

**SFigure 2**

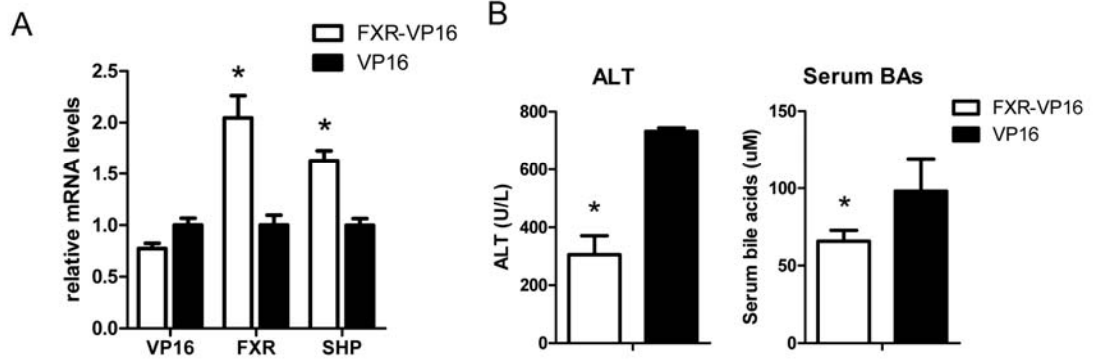

**SFigure 3**

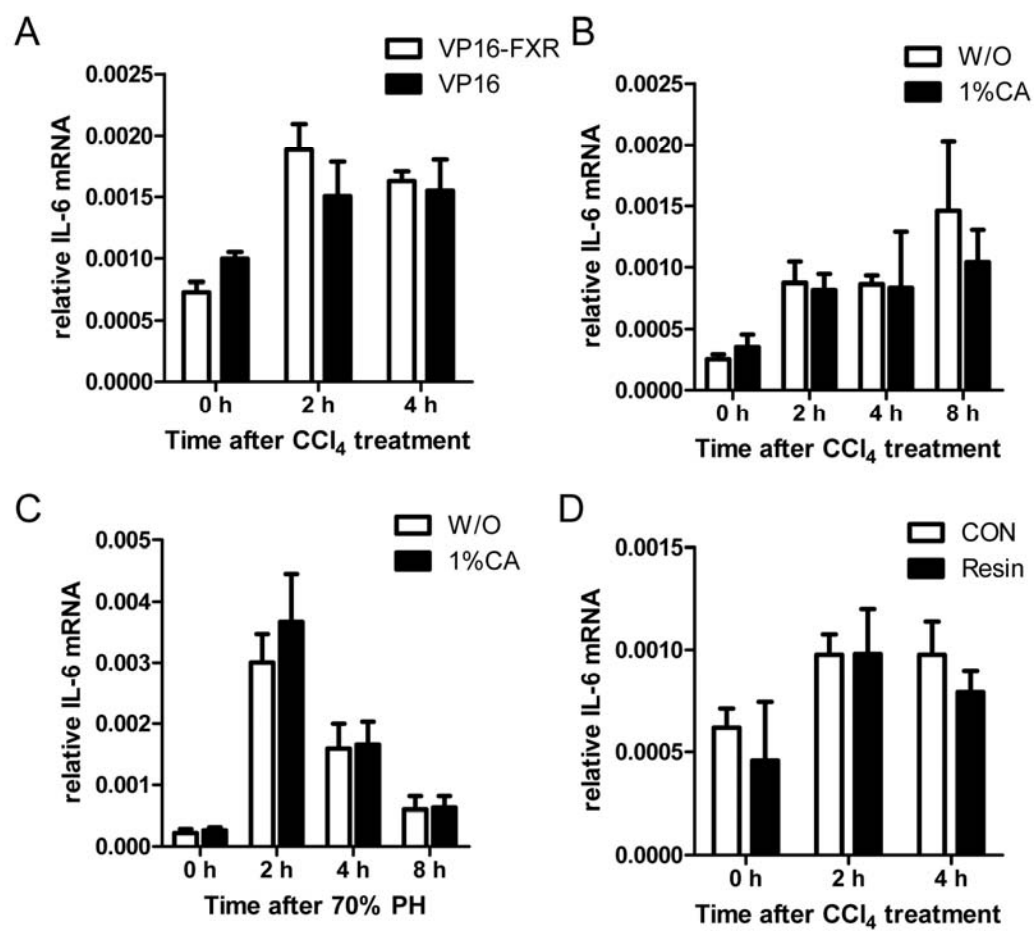



**SFigure 5**

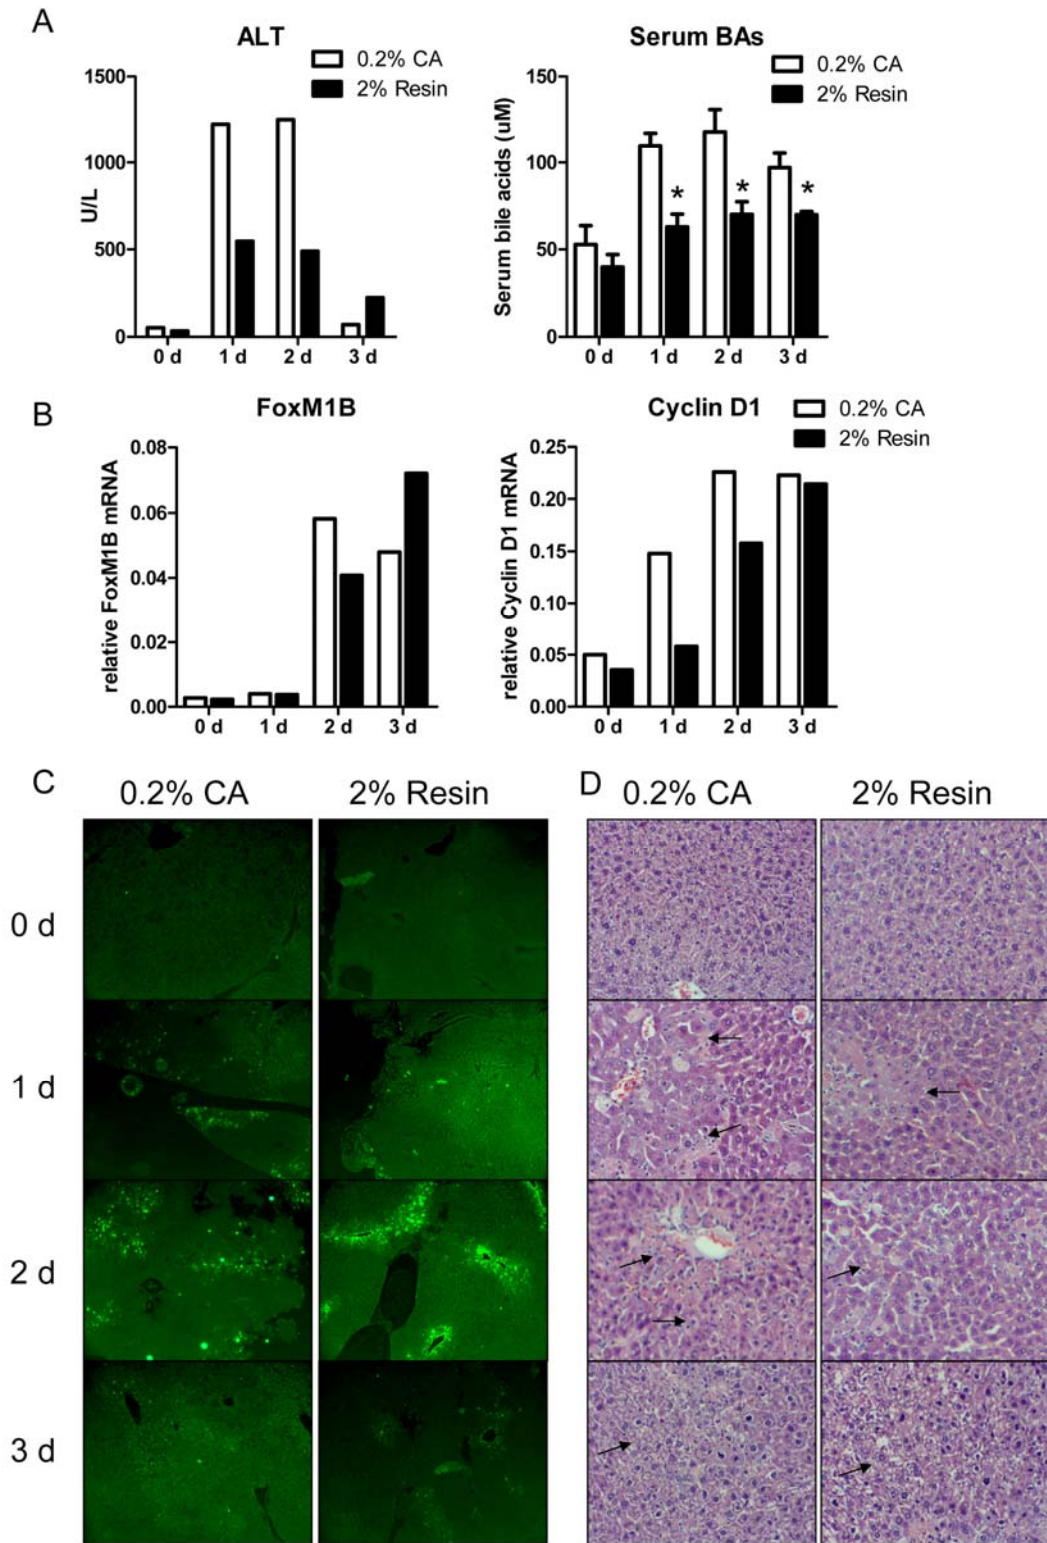

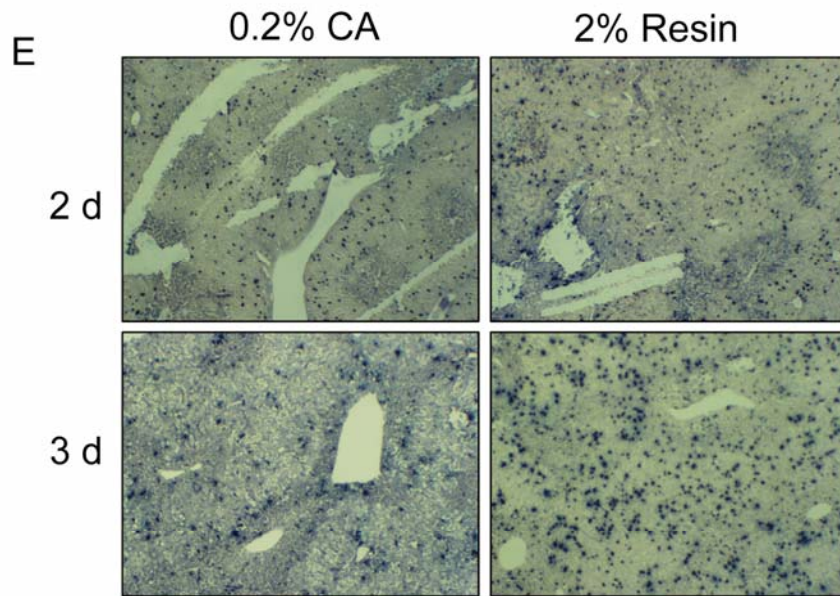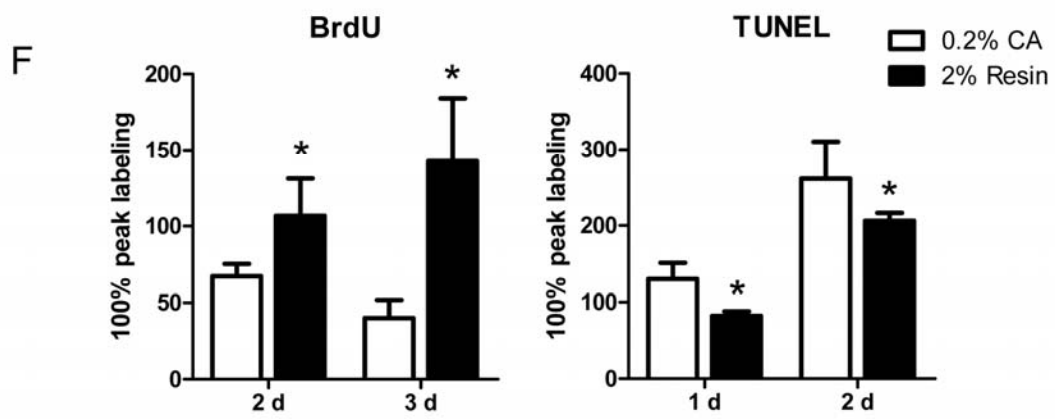

**STABLE 1**

| <b>Real-time PCR primers</b> | <b>Sequences</b>                  |
|------------------------------|-----------------------------------|
| mBcl-xl-F                    | CTTTCGGGATGGAGTAAACTGG            |
| mBcl-xl-R                    | CCCGTAGAGATCCACAAAAGTG            |
| mBSEP-F                      | GGATGGTTTGACTGCACTTCTG            |
| mBSEP-R                      | AGAGGACTGACAGCGAGAATCA            |
| mc-Fos-F                     | ACTTCGACCATGATGTTCTCGG            |
| mc-Fos-R                     | AAAGTTGGCACTAGAGACGGAC            |
| mc-Jun-F                     | AGTGACGGACCGTTCTATGACTG           |
| mc-Jun-R                     | TGAGAAGGTCCGAGTTCTTGGC            |
| mc-Myc-F                     | CTTACAATCTGCGAGCCAGGAC            |
| mc-Myc-R                     | GTACGGAGTCGTAGTCGAGGTC            |
| mCyclinD1-F                  | TACTTCAAGTGCGTGCAGAAGG            |
| mCyclinD1-R                  | CAAGGGAATGGTCTCCTTCATC            |
| mCYP7A1-F                    | GACGAATTCATGATGAGCATTCTTTGATC     |
| mCYP7A1-R                    | CATGCGGCCCGCCCTCTTCTTCCAACCACATAT |
| mFoxM1B-F                    | GGATTCCAAGAGAGCAGAGGTG            |
| mFoxM1B-R                    | CCGATTCTGCTCCAGGTGACAA            |
| mFXR-F                       | CTGCGTGATGGACATGTACATG            |
| mFXR-R                       | CCTGCAAACTTGGTTGTGGAGG            |
| mIL-6-F                      | CAAAGCCAGAGTCCTTCAGAG             |
| mIL-6-R                      | TGGTCCTTAGCCACTCCTTC              |
| mMRP2-F                      | CCAGTGCACGGTCATCACTATC            |
| mMRP2-R                      | GGACCCATATTGGACAGCAGTT            |
| mMRP3-F                      | ACCATCCGTACCCAGTTTGAAC            |
| mMRP3-R                      | GGCCATCCCATAGAAGATGC              |
| mMRP4-F                      | CCTCTTTTACAAGATGGTTTCAGCA         |
| mMRP4-R                      | TCCATTGGAGGTGTTTCATAACC           |
| mNTCP-F                      | ATCTGACCAGCATTGAGGCTCT            |
| mNTCP-R                      | CCGTCTAGATTCCCTTTGCTGT            |
| mOATP1-F                     | CCTGTTTACATTGGGGAAGCTCTG          |
| mOATP1-R                     | GGGAGAAAGCTTGATCCTCTCA            |
| mSHP-F                       | GTCTTTCTGGAGCCTTGAGCTG            |
| mSHP-R                       | GTAGAGGCCATGAGGAGGATTC            |
| mSOCS3-F                     | GTAGACTTCACGGCTGCCAAC             |
| mSOCS3-R                     | AACTTGCTGTGGGTGACCAT              |
| mTNFa-F                      | CGCCCTTCCAGAACTCCAGGCG            |
| mTNFa-R                      | TGCTACGACGTGGGCTACAG              |
| VP16-F                       | CTCGACGACTTGGGCTTTAG              |
| VP16-R                       | TTTACACTCCCGGTACAGGTC             |
